# Supplementary material for: RIOK2 Contributes to Cell Growth and Protein Synthesis in Human Oral Squamous Cell Carcinoma
Source: MDPI journal article supplement (doi:10.3390/curroncol30010031), 2022-12-26
Supplement: s1 [file s1]

# Supplementary Figure S1

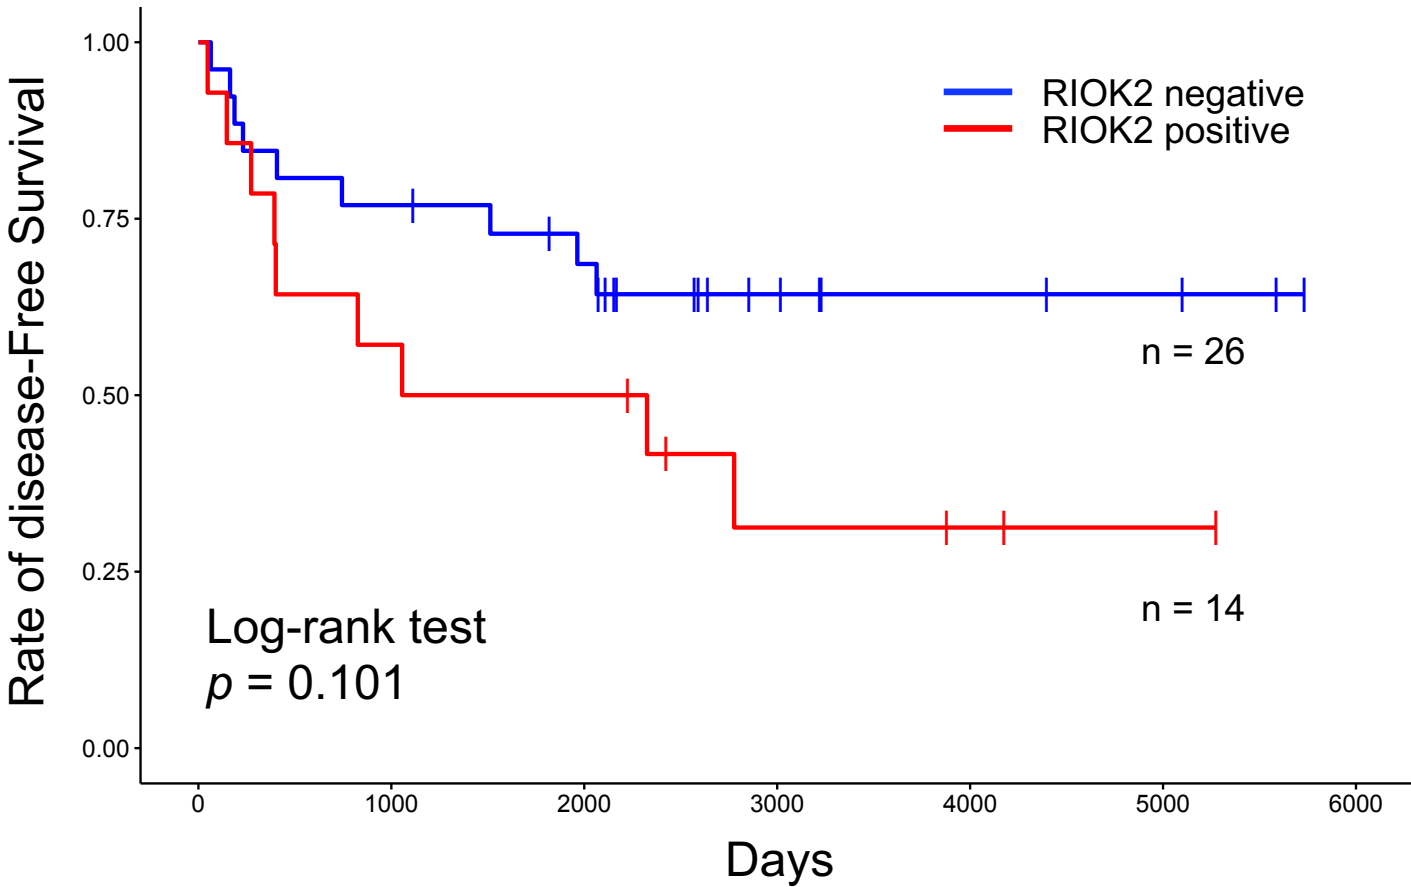

**Supplementary Figure S1.** Relationship between RIOK2 expression and disease-free survival (DFS). DFS curves for the RIOK2-positive (red line, n = 14) and RIOK2-negative (blue line, n = 26) subgroups ( $p = 0.101$ ).

# Supplementary Figure S2

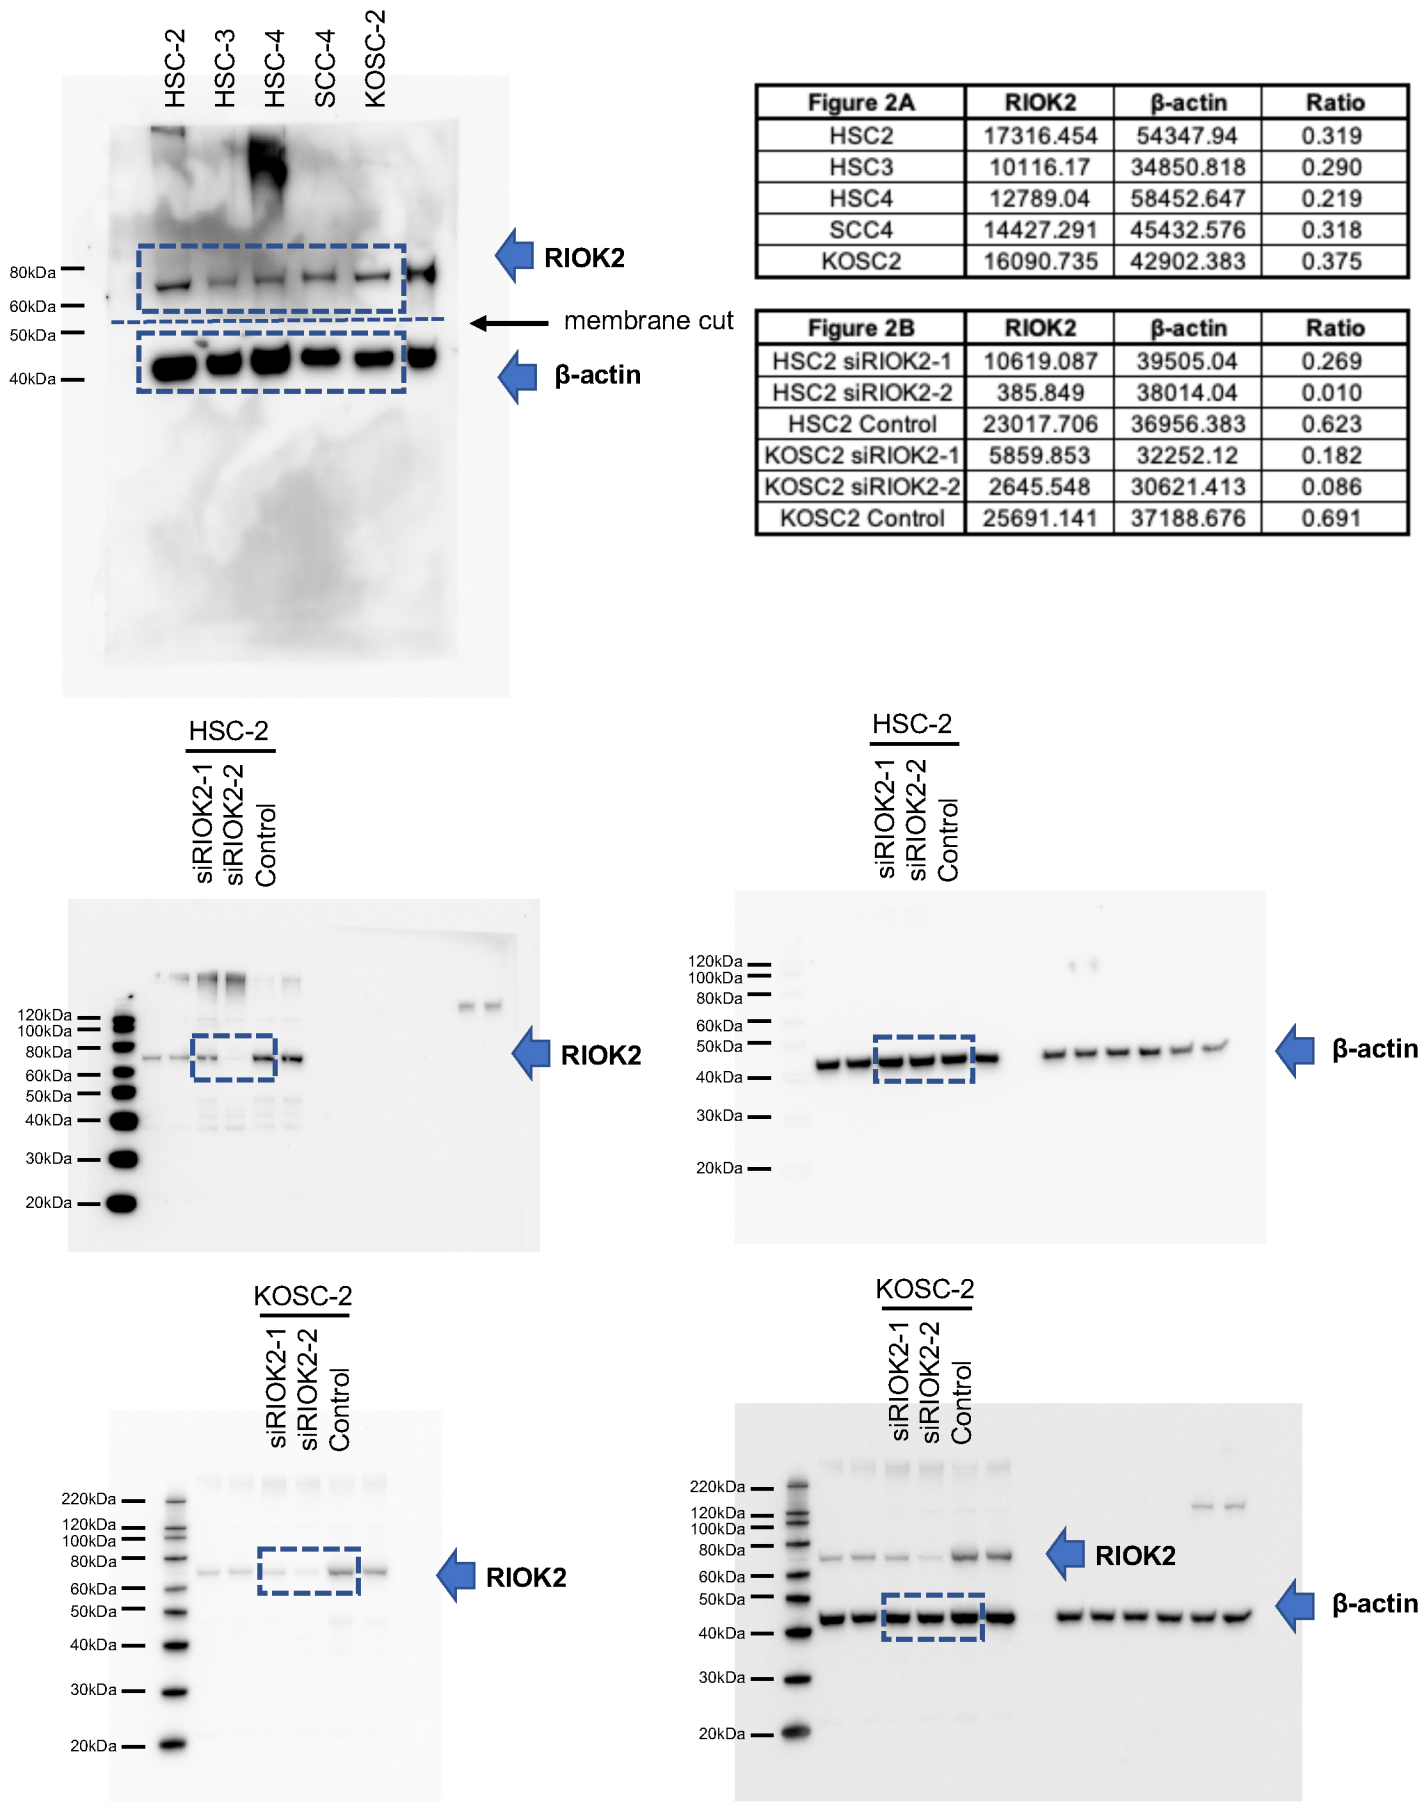

**Supplementary Figure S2.** Uncropped full-length images of western blot analysis and the densitometry intensity/reading ratio in Figure 2.

# Supplementary Figure S3

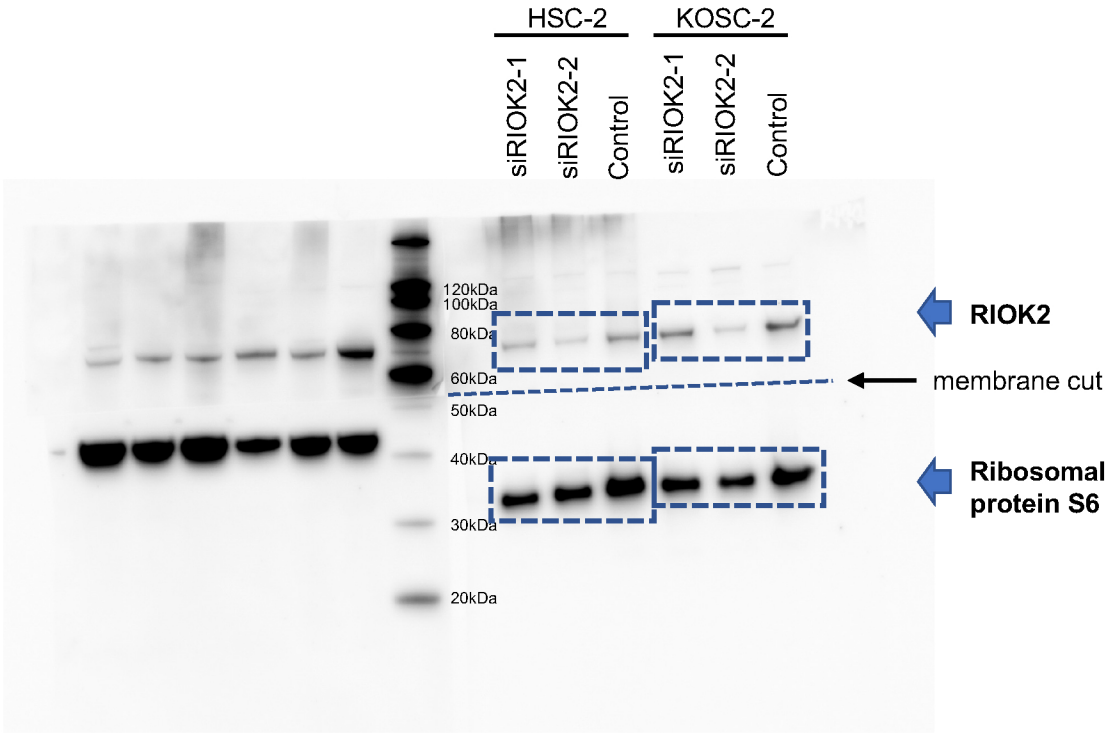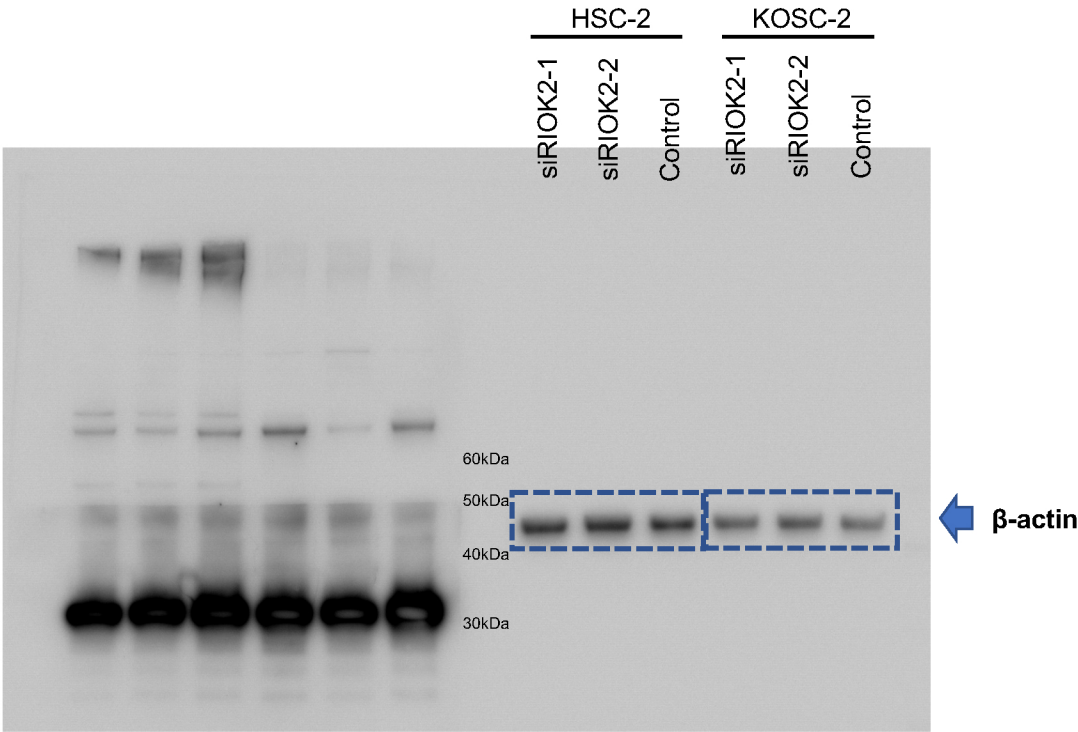

| Figure 3A       | RIOK2     | S6        | β-actin   | RIOK2/β-actin ratio | S6/β-actin ratio |
|-----------------|-----------|-----------|-----------|---------------------|------------------|
| HSC2 siRIOK2-1  | 6013.137  | 23211.593 | 22433.321 | 0.268               | 1.035            |
| HSC2 siRIOK2-2  | 3034.782  | 25954.371 | 24537.342 | 0.124               | 1.058            |
| HSC2 Control    | 9830.108  | 34854.291 | 21559.149 | 0.456               | 1.617            |
| KOSC2 siRIOK2-1 | 17444.179 | 26119.664 | 15362.472 | 1.136               | 1.700            |
| KOSC2 siRIOK2-2 | 4199.61   | 20435.472 | 16025.543 | 0.262               | 1.275            |
| KOSC2 Control   | 22380.735 | 29838.513 | 12088.693 | 1.851               | 2.468            |

Supplementary Figure S3. Uncropped full-length images of western blot analysis and the densitometry intensity/reading ratio in Figure 3.
